# Supplementary material
Source: MDPI journal article supplement (https://www.mdpi.com/2313-5778/8/2/41)
Supplement: s1 [file s1]

Archive with 1 entries (1 files):
- genealogy-2882718-supplementary.pdf
